# Supplementary material
Source: publisher figshare collection journal article supplement (https://karger.figshare.com/articles/dataset/_/22573759)
Supplement: Supplementary file 1 [file 1]

Supplementary Figures.

## Supplementary Figure 1

A

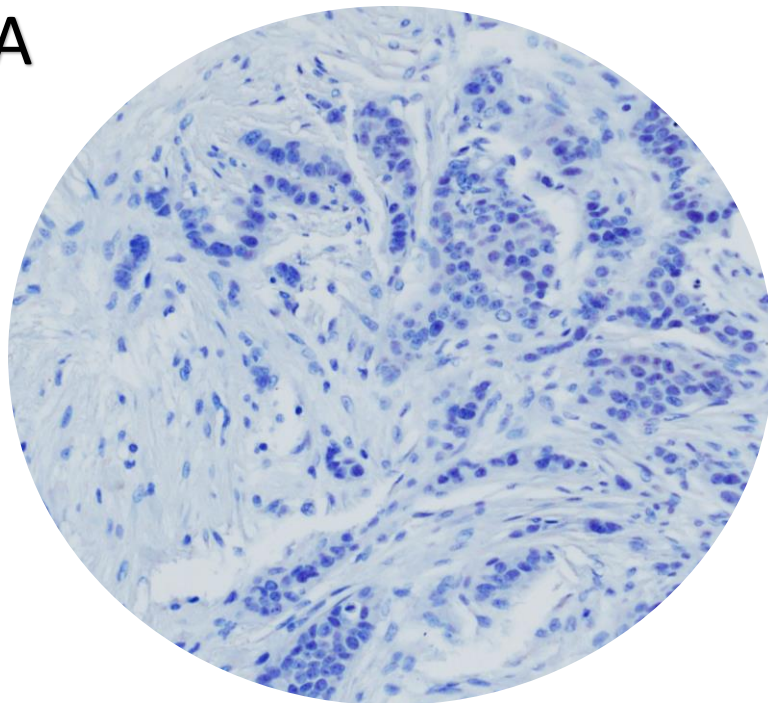

B

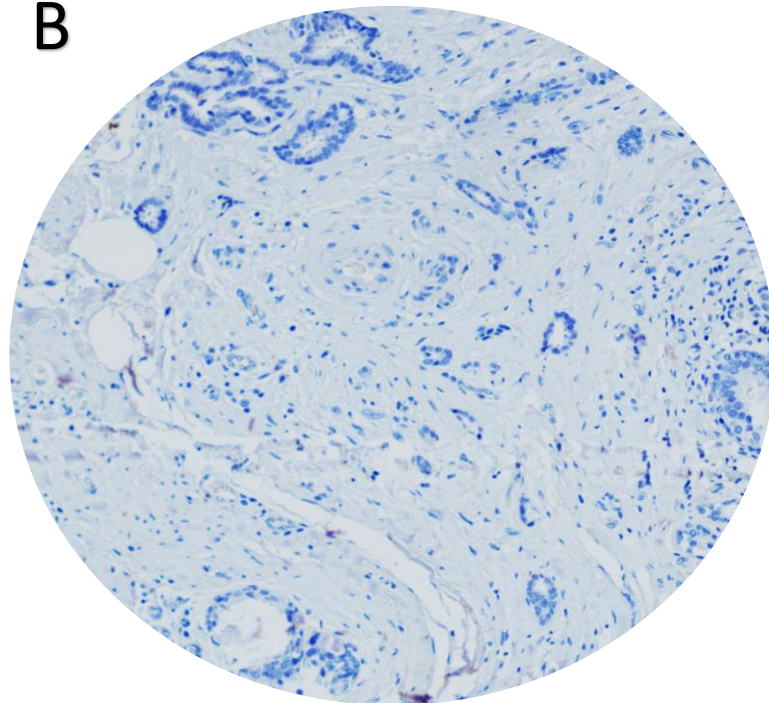

C

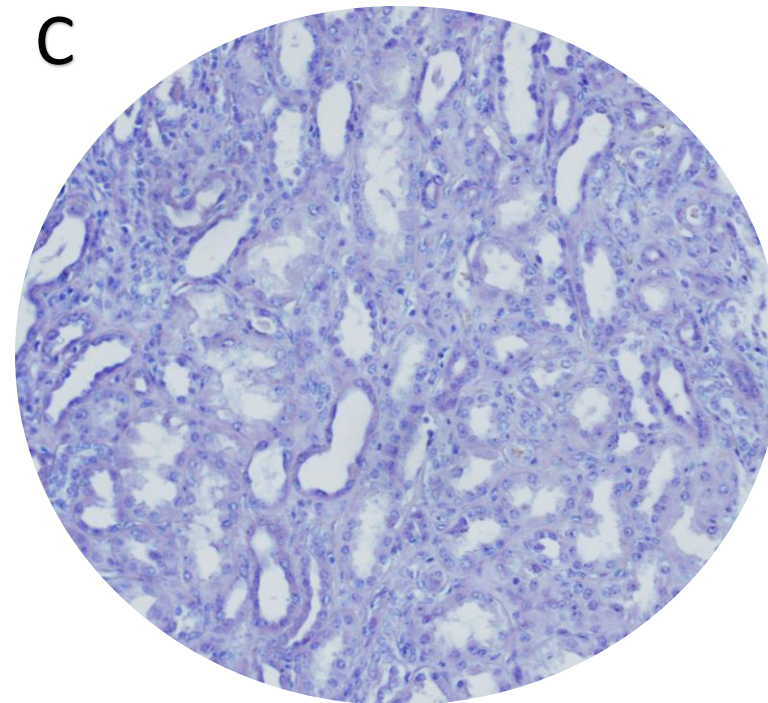

**Supplementary Figure 1.** Negative control was achieved by the application of anti-rabbit IgG following the same staining protocol (Dako, polyclonal antirabbit immunoglobulins HRP, REF: P0447, LOT:41236467, 1:1000) in breast cancer tumours **A** and **B** as well as Kidney tissue **C**.

## Supplementary Figure 2

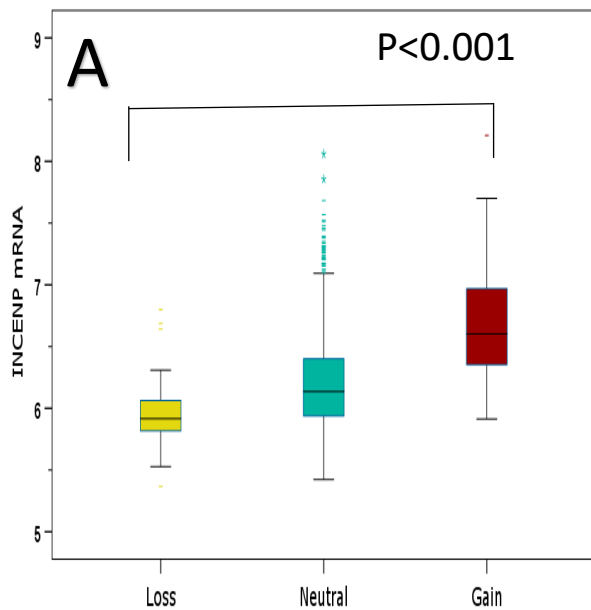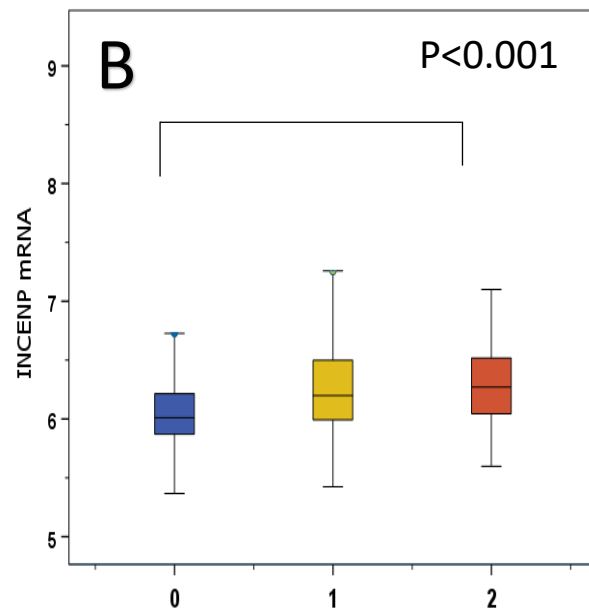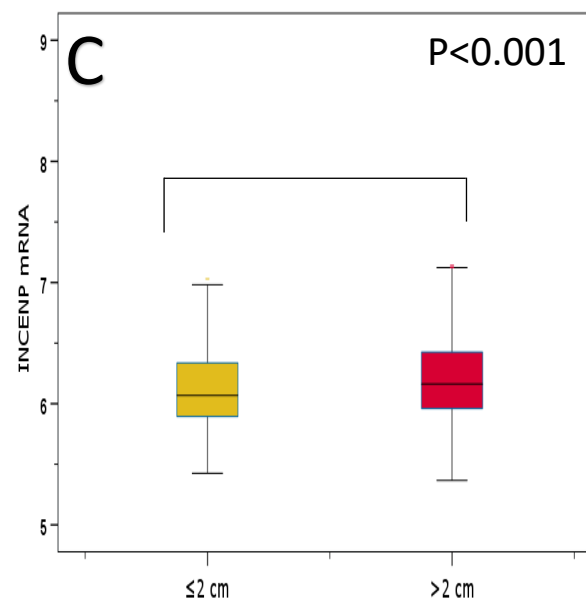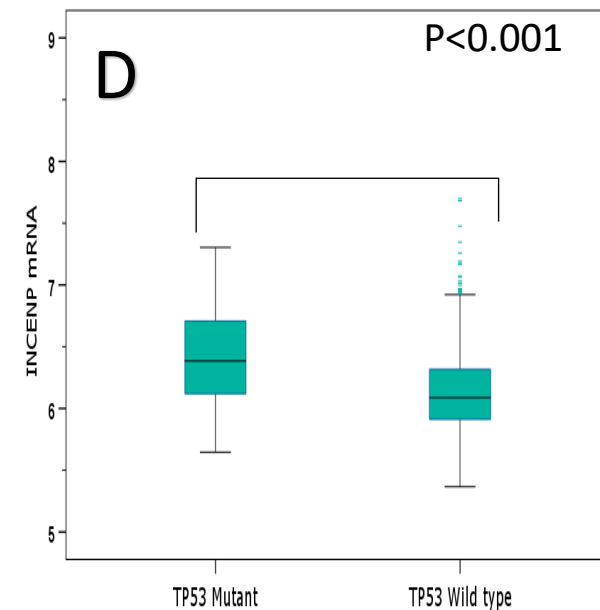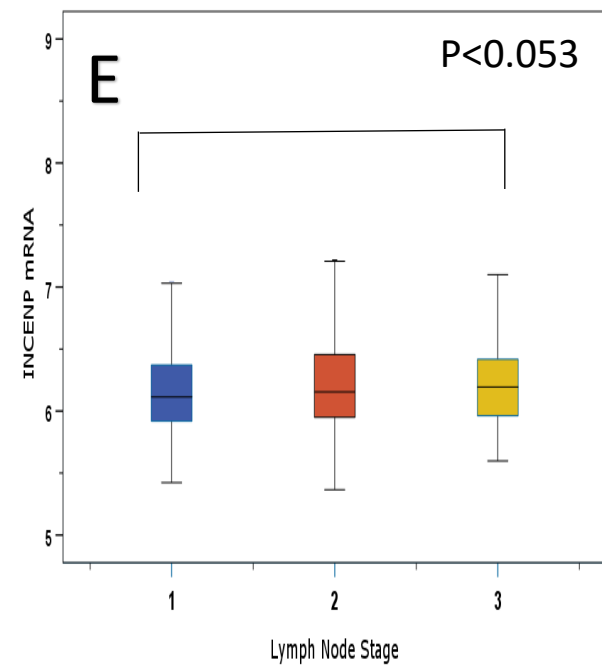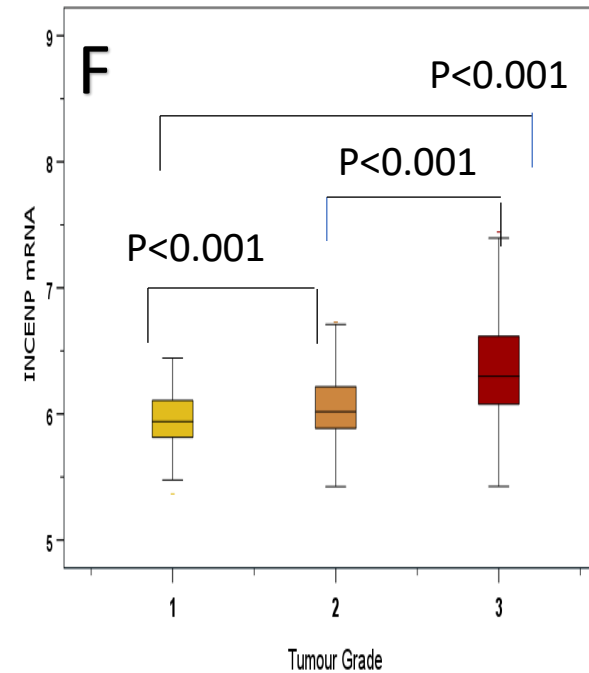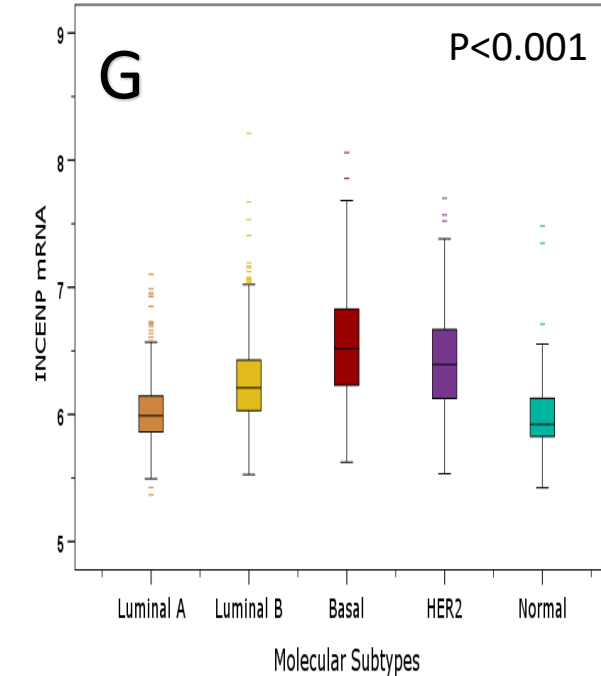

**Supplementary Figure 2.** INCENP mRNA expression and its association with copy number variations, clinicopathological parameters and molecular subtypes in METABRIC cohort.

A. INCENP and gene copy number variations

B. INCENP and Nottingham prognostic index.

C. INCENP and tumour size.

D. INCENP and TP53 mutation status

E. INCENP and lymph node stage

F. INCENP and tumour grade

G. INCENP and PAM50 BC subtypes

in the METABRIC cohort using one-way analysis of variance with the post-hoc Tukey test.

## Supplementary Figure 3

Expression of INCENP in BRCA based on Sample types

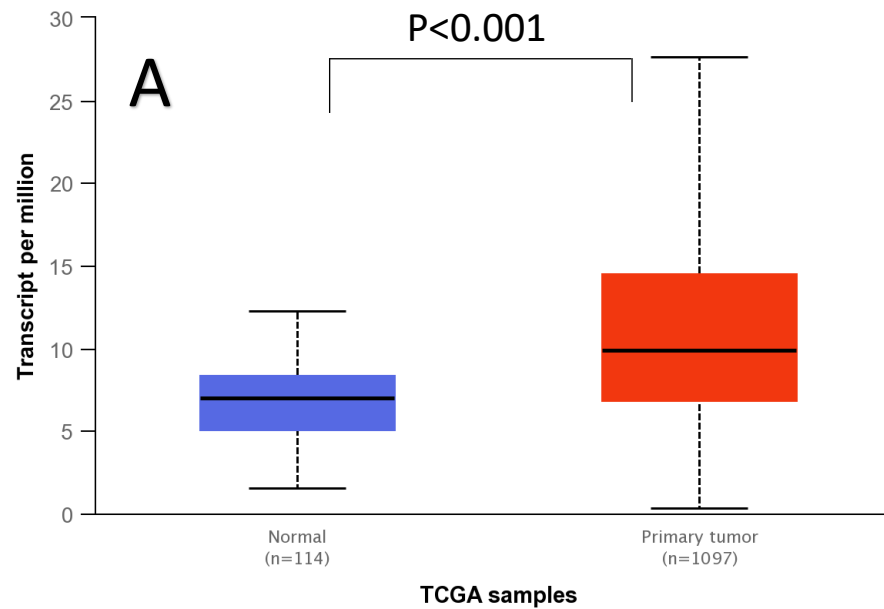

Expression of INCENP in BRCA based on TP53 mutation status

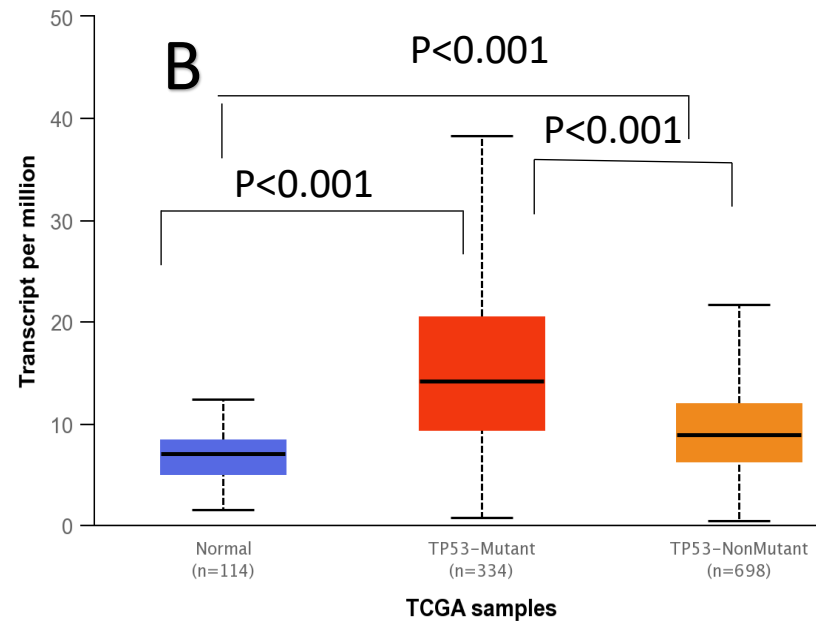

Expression of INCENP in BRCA based on breast cancer subclasses

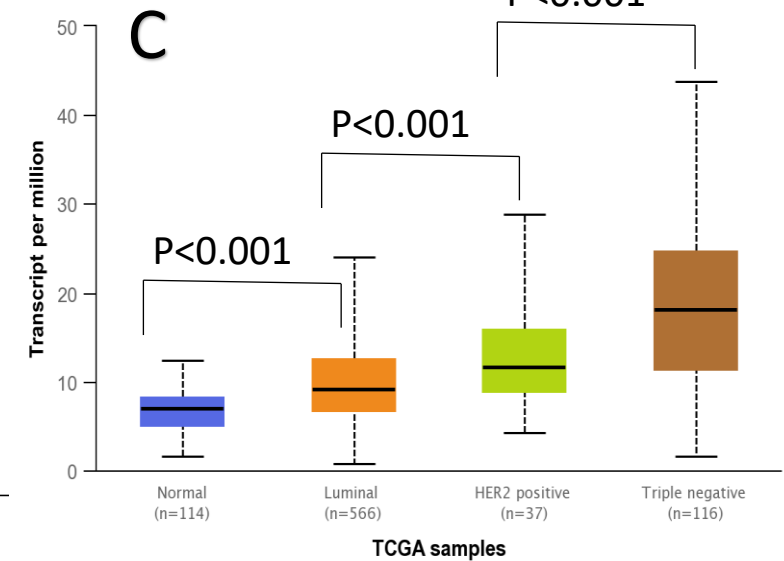

Expression of INCENP in BRCA based on Histologic subtypes

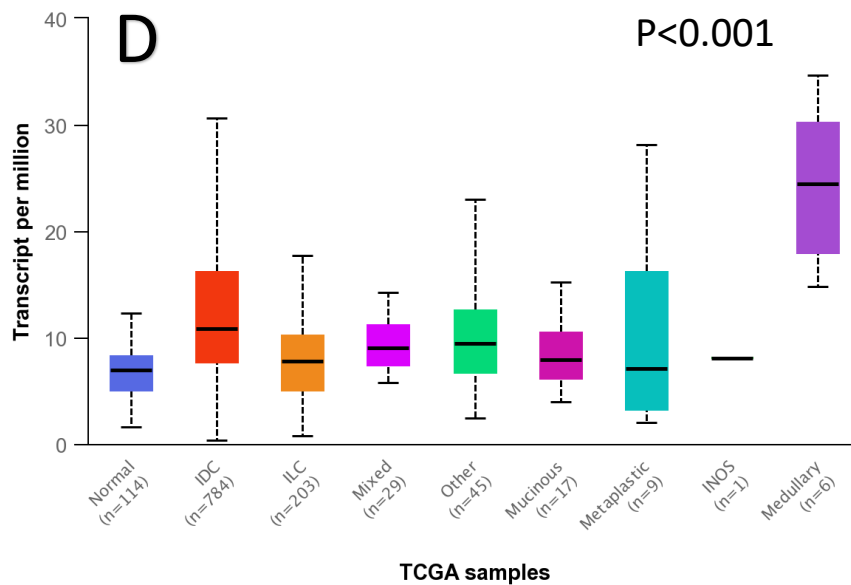

Expression of INCENP in BRCA based on nodal metastasis status

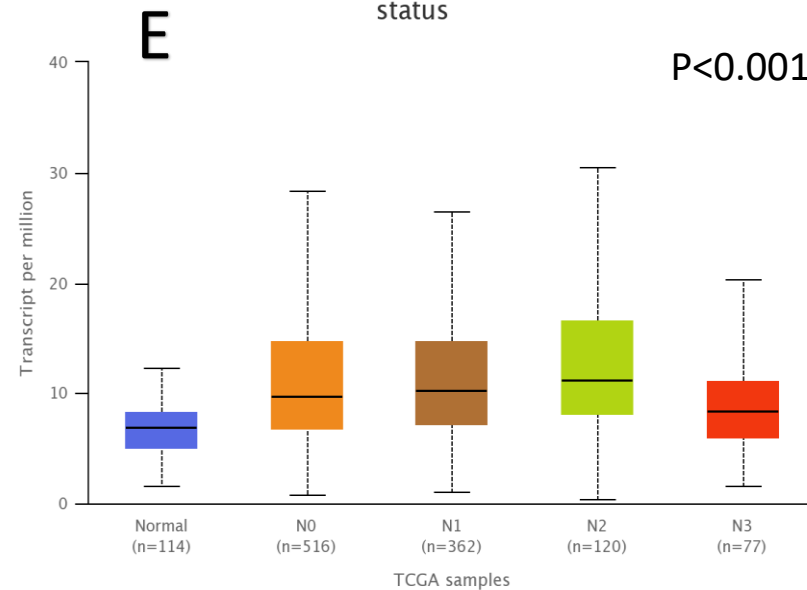

Expression of INCENP in BRCA based on patient's age

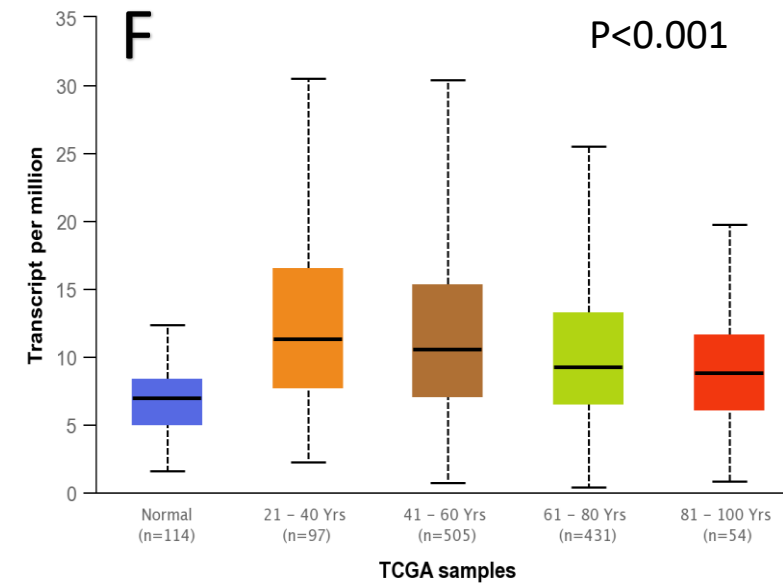

**Supplementary Figure 3.** INCENP mRNA expression and its association with clinicopathological parameters and molecular subtypes

- A. INCENP expression in normal and tumour tissue.
- B. INCENP and TP53 mutation status
- C. INCENP and PAM50 BC subtypes.
- D. INCENP and Histological subtypes.
- D. INCENP and lymph node stage.
- E. INCENP and tumour grade in the TCGA cohort.

## Supplementary Figure 4

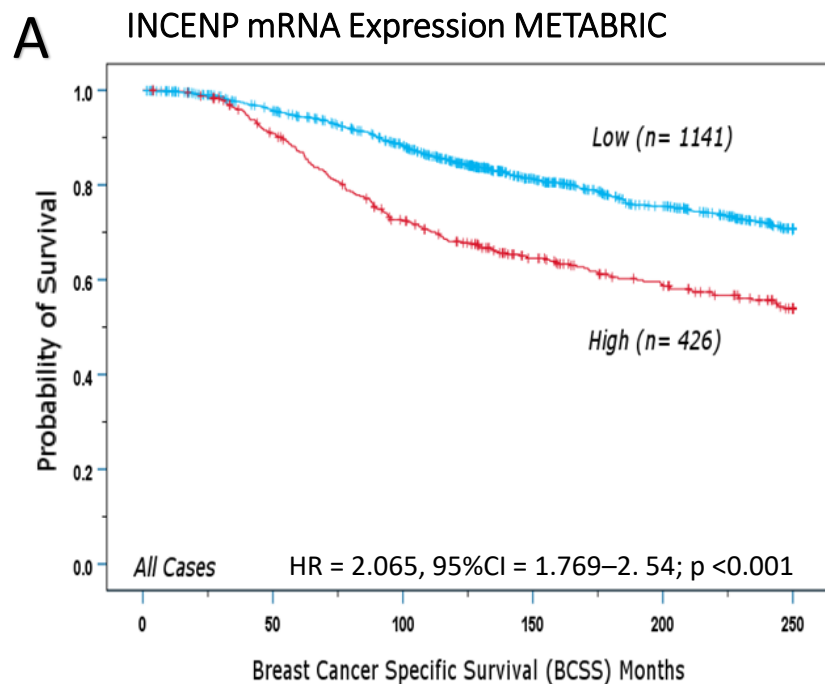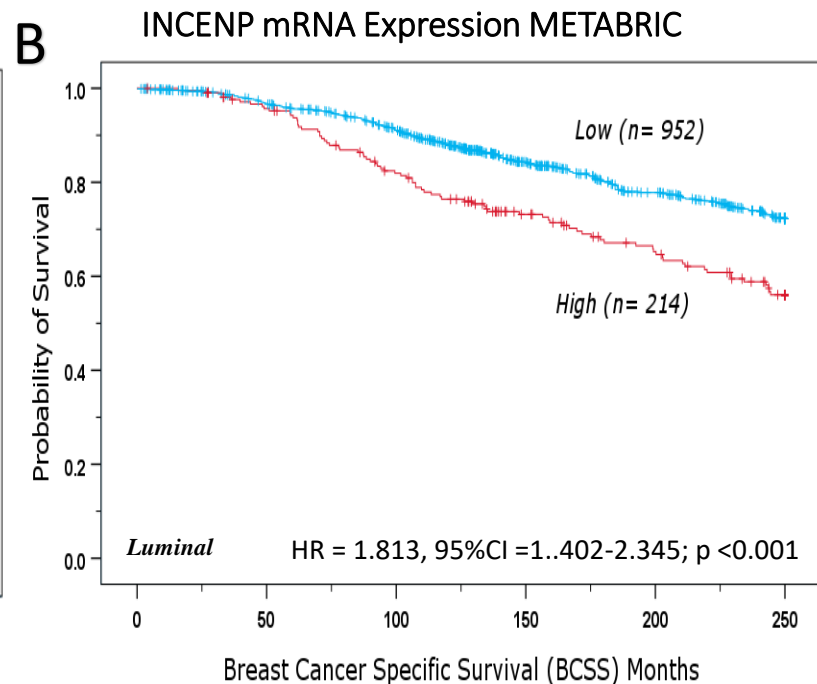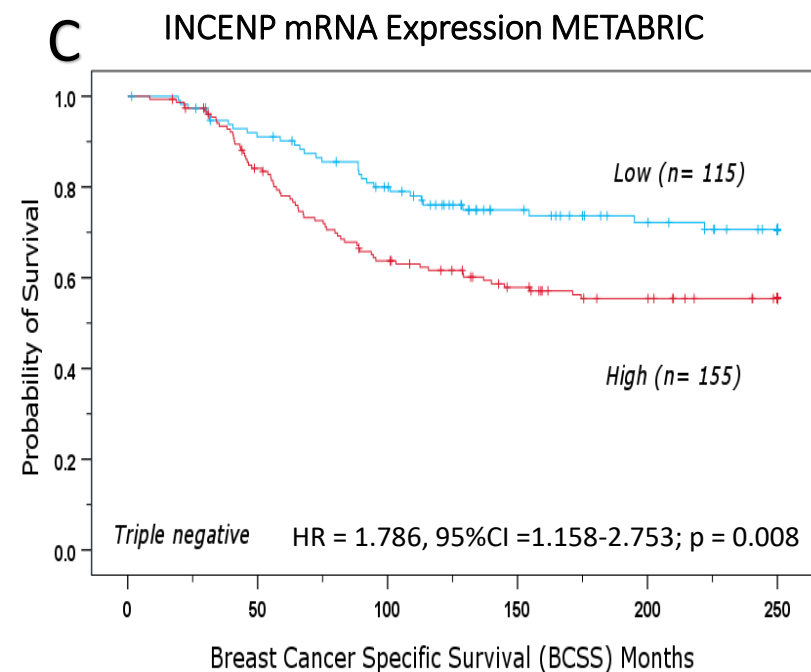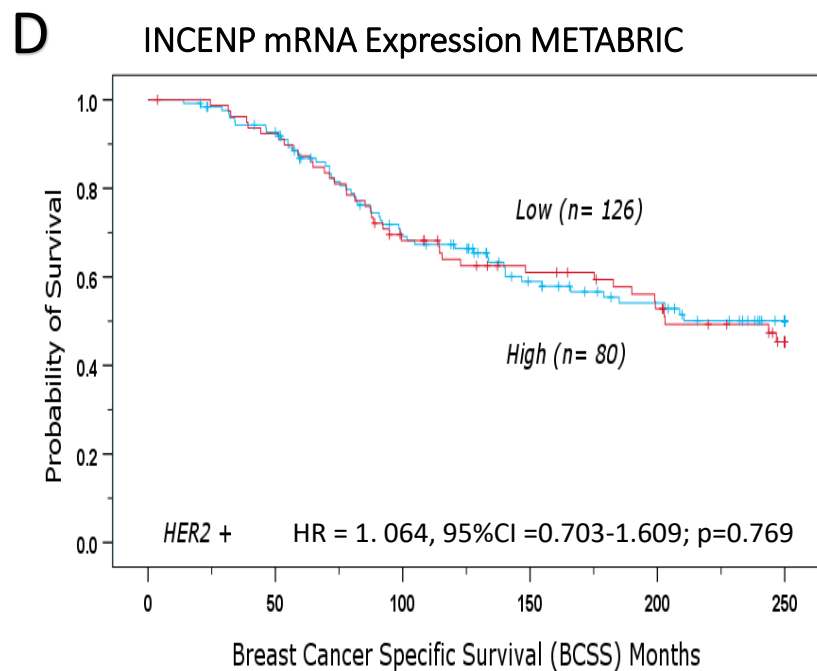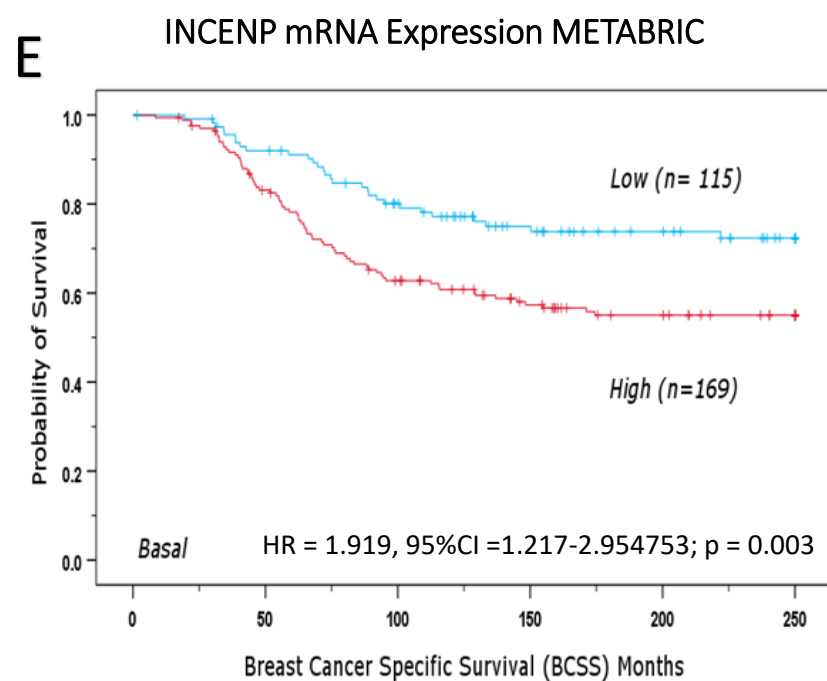

**Supplementary Figure 4.** INCENP mRNA expression against Breast Cancer Specific Survival (BCSS) in

A. All cases,

B. Luminal BC.

C. Triple-negative BC.

D. Human epidermal growth factor receptor 2 (HER2 +) tumours.

E. Basal Subtype, in the METABRIC cohort

## Supplementary Figure 5

**A**

## INCENP mRNA Expression TCGA

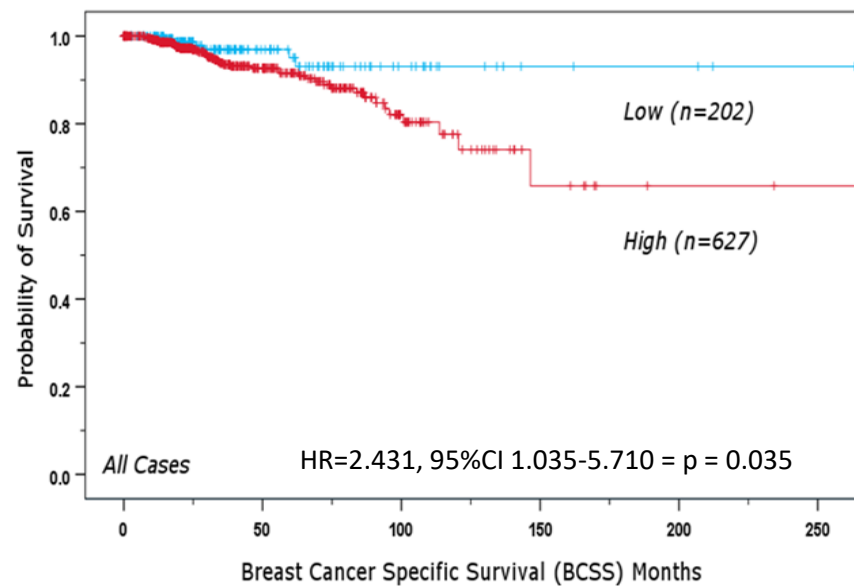**B**

## INCENP mRNA Expression TCGA

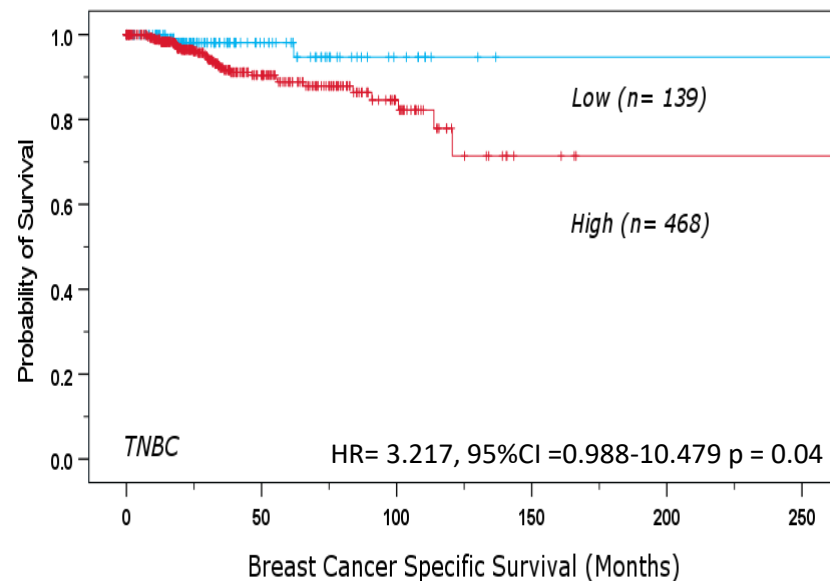**C**

## INCENP mRNA Expression TCGA

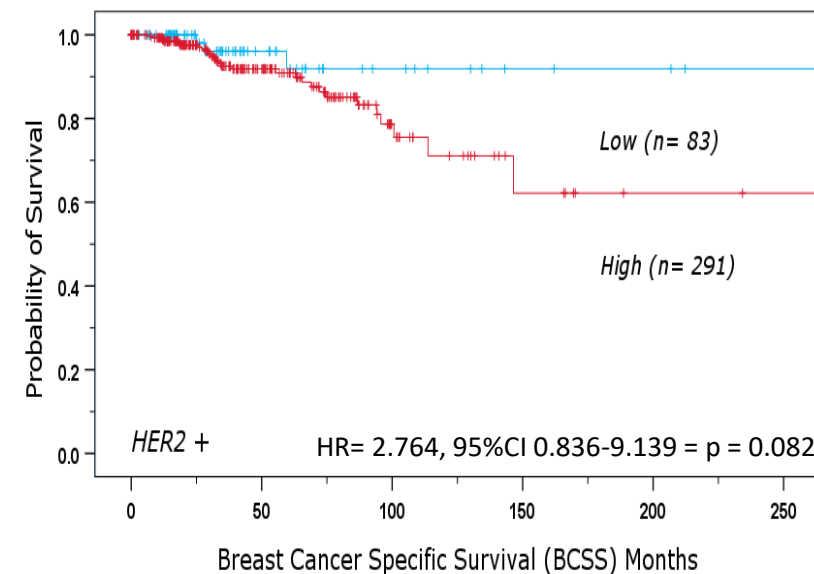**D**

## INCENP mRNA Expression TCGA

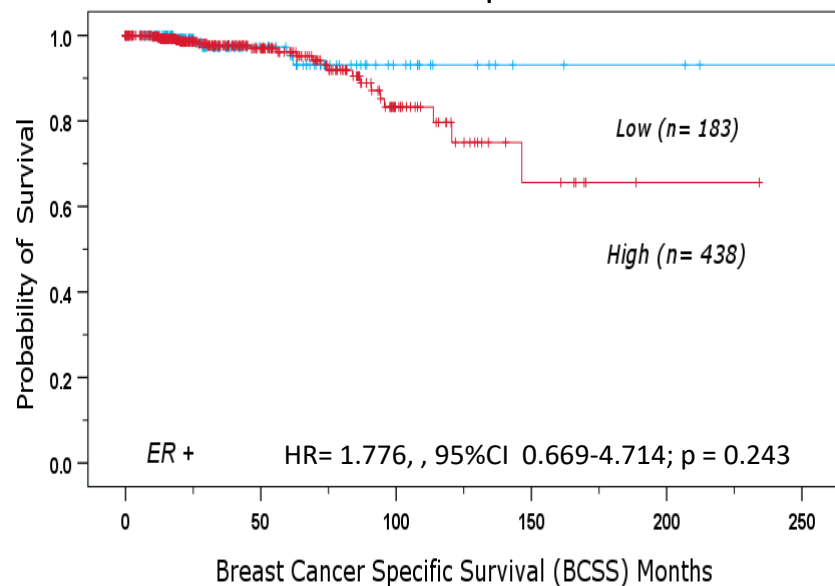**E**

## INCENP mRNA Expression TCGA

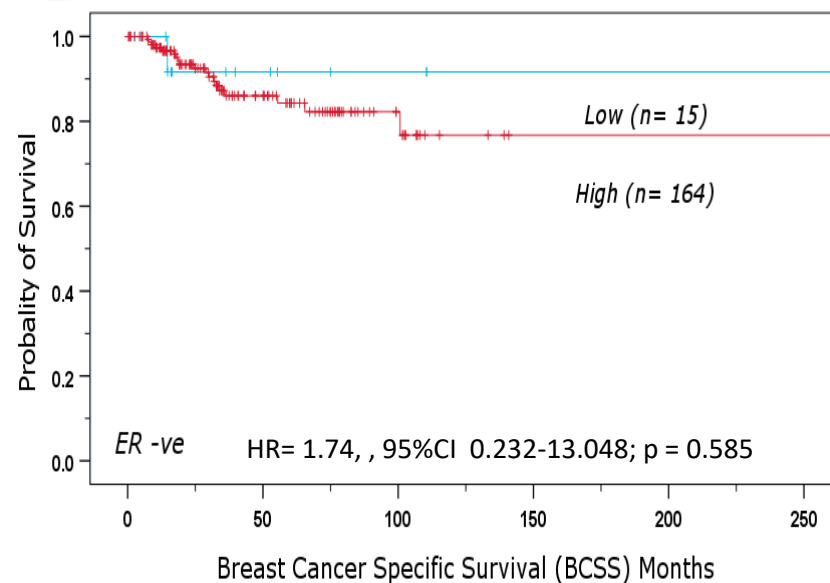

**Supplementary Figure 5.** INCENP mRNA expression and Breast Cancer Specific Survival (BCSS) in A. All cases,  
B. Triple-negative tumours  
C. Human epidermal growth factor receptor 2 (HER2 +) tumours.  
D. (ER)-positive tumours  
E. ER-negative tumours. .  
in the TCGA cohort

## Supplementary Figure 6

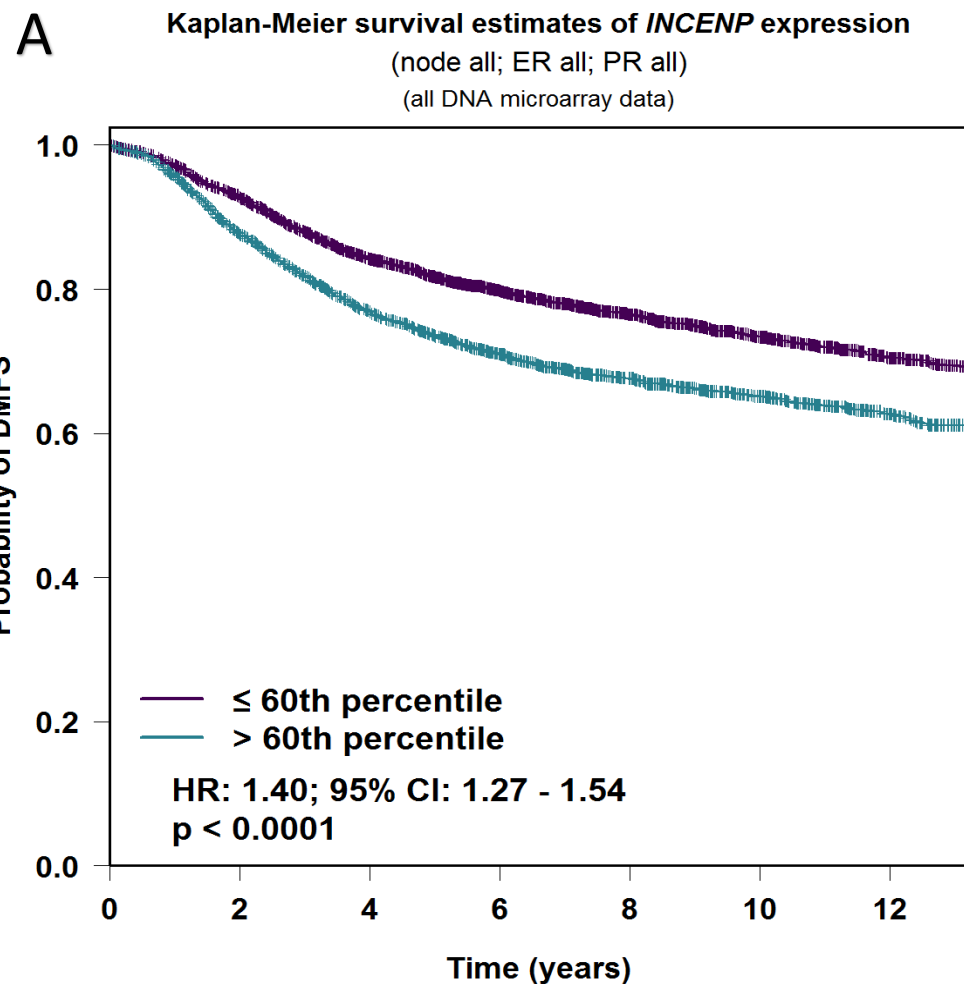

Patients at risk:

|   |       |       |       |       |       |       |     |          |
|---|-------|-------|-------|-------|-------|-------|-----|----------|
|   | 3 739 | 3 309 | 2 739 | 2 126 | 1 588 | 1 131 | 684 | (Events) |
| — | 2 552 | 2 129 | 1 708 | 1 314 | 981   | 703   | 441 | (812)    |

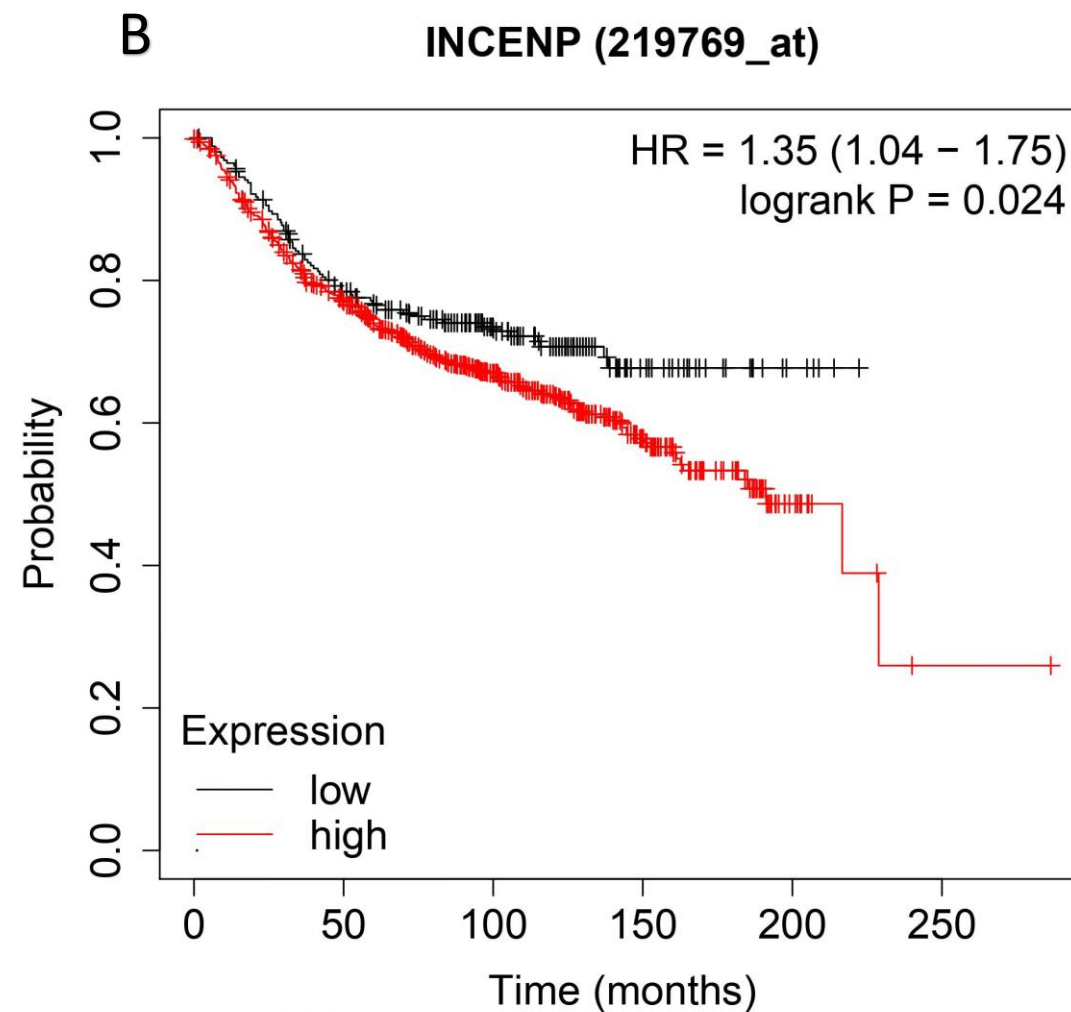

Number at risk

|      |     |     |     |     |    |   |
|------|-----|-----|-----|-----|----|---|
| low  | 256 | 189 | 118 | 30  | 5  | 0 |
| high | 769 | 556 | 327 | 100 | 13 | 1 |

**Supplementary Figure 6.** INCENP mRNA expression and Breast Cancer Specific Survival (BCSS) in **A** the Breast Cancer Gene Expression Miner v4.3 database and **B** the Kaplan–Meier plotter.
